# Supplementary material for: One-pot synthesis of gamma-graphyne supported Pd nanoparticles with high catalytic activity
Source: Royal Society of Chemistry journal article supplement (doi:10.1039/d3na00096f), 2023-01-01
Supplement: d3na00096f2.pdf [file d3na00096f2.pdf]

## Supporting Information

### One-pot synthesis of Gamma-graphyne supported Pd nanoparticles with high catalytic activity

Shan He#, Bin Wu\*#, Ziwei Xia, Panxiang Guo, Yao Li, Shiqiang Song\*

College of Chemistry and Chemical Engineering, Shanghai University of Engineering Science, Shanghai 201620, People's Republic of China

\*Corresponding authors:

Bin Wu (wubinchem@163.com ); Shiqiang Song ([songchem@126.com](mailto:songchem@126.com))

#### Section S1. Materials and Methods

Hexabromobenzene, Acetylenedicarboxylic acid, cuprous iodide, triethylamine, Dichlorobis(triphenylphosphine)Palladium(II) and N,N-Dimethylformamide were purchased from Shanghai Titan Scientific Co., Ltd..

<sup>13</sup>C Solid-state NMR spectra were obtained using a Bruker AVANCE III Fourier 400 M spectrometer equipped with a 7.5 mm T3HX probe at 100.54 MHz and a spinning rate of 9 kHz. Fourier transform infrared (FT-IR) spectra was acquired using a Thermofisher Scientific Nicolet IS5 Fourier transform infrared spectroscopy. Renishaw inVia was used to obtain Raman data. X-ray Powder Diffractometer (XRD) was measured on a Bruker D8 Advance. Field-emission Scanning (FE-SEM) was carried with an accelerating voltage ranging from 1.0 to 15 kV on a HITACHI S4800. Energy Dispersive Spectrometer (EDS) was recorded on a Bruker Quantax 400. The sample was prepared by dispersing the material onto conductive adhesive tapes attached to a flat aluminum sample holder and then coated with Aurum. Transmission Electron Microscope (TEM) was recorded on a FEI Tecnai G2 F20. Energy Dispersive X-ray Spectrometer (EDX) was obtained on a Oxford 60T. Atomic Force Microscope (AFM)

was measured on a Veeco Multimode through Tapping Mode in air at room temperature. Impedance measurement was collected on a BAS Epsilon Electrochemical Workstation. X-ray photoelectron spectra (XPS) was acquired on Thermofisher Scientific Escalab 250Xi. Ultraviolet photoelectron spectra (UPS) was performed on a Thermofisher Scientific Escalab 250Xi. UV-Vis Diffuse Reflection Spectroscopy (UV-Vis DRS) was measured on a SHIMADZU UV- 3600Plus. Thermogravimetric analysis (TGA) from 20-800 °C was obtained on a NETZSCH STA 449 F3 in nitrogen atmosphere using a 10 °C/min ramp without equilibration delay. The nitrogen isotherms were recorded at 77 K with a Micromeritics ASAP 2020 surface area size analyzer. Before measurement, the samples were degassed in vacuum at 100 °C for 12 h.

## **Section S2 Synthesis and Methods**

**Synthesis of  $\gamma$ -Graphyne ( $\gamma$ -GY) through decarboxylative coupling** <sup>[S1, S2]</sup>. The reactants hexabromobenzene (551.5 mg, 1.0 mmol) and Acetylenedicarboxylic acid (1368.7 mg, 12 mmol), catalyst Dichlorobis(triphenylphosphine)Palladium(II) (210.6 mg, 0.3 mmol) and cuprous iodide (114.3 mg, 0.6 mmol) were loaded into a Schlenk Flask, and dissolved in DMF (10 ml) mixed with triethylamine(2.125 ml). The solution was stirred at 60 °C for 24 h under argon gas atmosphere. At the end of the reaction, a black solid was produced. After filtration and rinsing with DMF, the product was then sonicated in benzene for 5 min to remove the unreacted reactants. After that, the product was rinsed with DMF, ethanol and water repeatedly, and the crude product of  $\gamma$ -GY was obtained by filtration; the crude product was refluxed by 4 M NaOH, 6 M HCl and 4 M NaOH for 2 h successively, and the solution was kept slightly boiling during reflux. Finally, the product of  $\gamma$ -GY was obtained by centrifugation at 9000 rpm for 10 min and freeze-drying for 12 hours.

**Synthesis of Pd/GO, Pd/TRGO and Pd/MWNT.** GO, HGO and CNT were sonicated in water for several minutes to form homogeneous aqueous dispersions (0.5 mg/mL), after which the metal salts  $K_2PdCl_4$  (0.2 mL, 10 mmol) were mixed with the

homogeneous aqueous dispersions (2 mL, 0.5 mg/mL) separately in an ice bath and stirred vigorously for 30 minutes each. The resulting products, i.e, Pd/GO, Pd/HGO and Pd/CNT, were collected by centrifugation and washing several times with pure water.

**Catalytic Reduction of 4-Nitrophenol (4-NP)** <sup>[S3]</sup>. The reduction of 4-NP was tested in a quartz cuvette and monitored by UV-Vis spectroscopy at room temperature. The aqueous solution of NaBH<sub>4</sub> (1.72 mL, 0.2 M) and 4-nitrophenol (0.28 mL, 1 mM) were mixed into water (4 mL). The mixture was stirred at room temperature for 5 min, 3 mL of which was removed and then different types of dispersions of Pd/ $\gamma$ -graphyne, Pd/GO, Pd/HGO, Pd/CNT and commercial Pd/C (10  $\mu$ L, 0.5 mg/mL) were added, respectively. Each mixture was immediately monitored by UV-Vis measurements, with spectra recorded every 2 s.

**Control experiment:** The Control experiment was carried out in a quartz cuvette and monitored by using UV-vis spectroscopy at room temperature. The aqueous solution of NaBH<sub>4</sub> (1.72 mL, 0.2 M) and 4-nitrophenol (0.28 mL, 1 mM) was mixed into water (4 mL), 3 mL of which was removed, and the mixture was immediately monitored by UV-Vis measurements, with spectra recorded every 2 s.

**Determination of the rate constant of Catalytic Reduction of 4-NP.** The determination of the reaction rate was measured in quartz cuvettes and monitored by UV-Vis spectroscopy at room temperature. The aqueous solutions of 4-NP (0.28 ml, 20  $\mu$ M, 30  $\mu$ M, 40  $\mu$ M, 50  $\mu$ M and 60  $\mu$ M) and NaBH<sub>4</sub> (1.72 mL, 0.2 M) were mixed into water (4 ml). Then a dispersion of Pd/ $\gamma$ -graphyne (10  $\mu$ L, 0.5 mg/mL) was added. The mixture was immediately monitored by UV-Vis measurements, with spectra recorded every 2 s. A linear relationship was observed between the rate constant and the concentration of 4-NP, indicating that the reaction is first order.

## Section S3 Characterization of $\gamma$ -graphyne

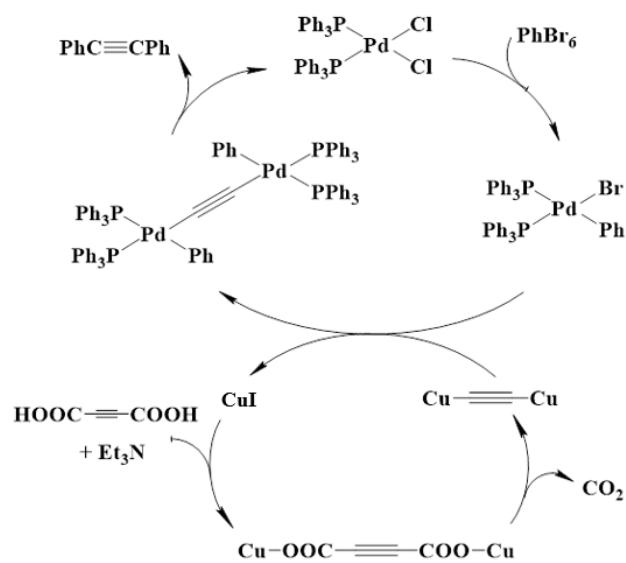

Figure S1. Schematic Diagram of Reaction Mechanism

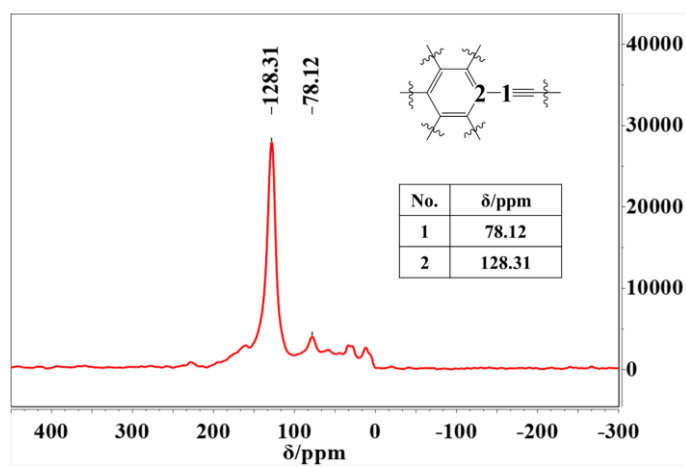

Figure S2. Solid state  $^{13}\text{C}$ -ssNMR of  $\gamma$ -graphyne (9 kHz)

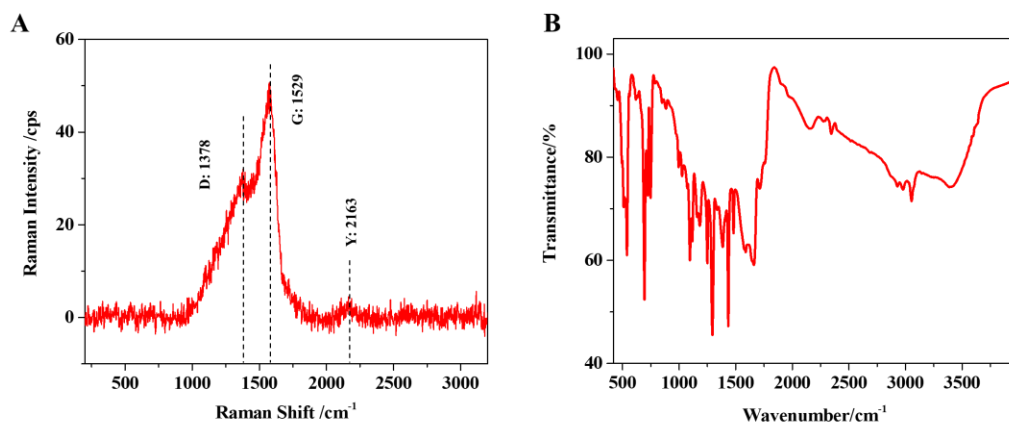

Figure S3. (A) Raman and (B) FT-IR spectra of  $\gamma$ -graphyne

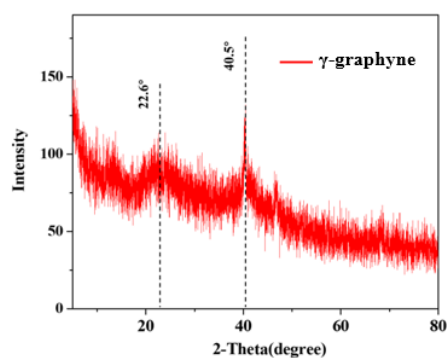

Figure S4. XRD of  $\gamma$ -graphyne

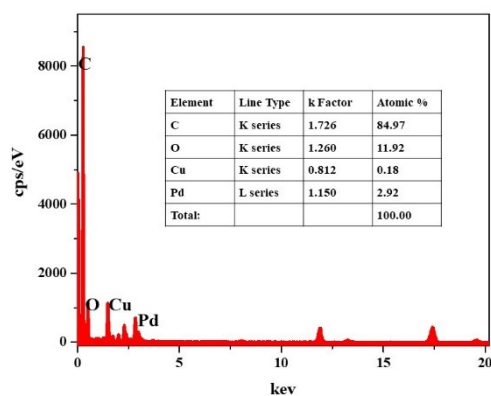

Figure S5. EDX of  $\gamma$ -graphyne (detail information)

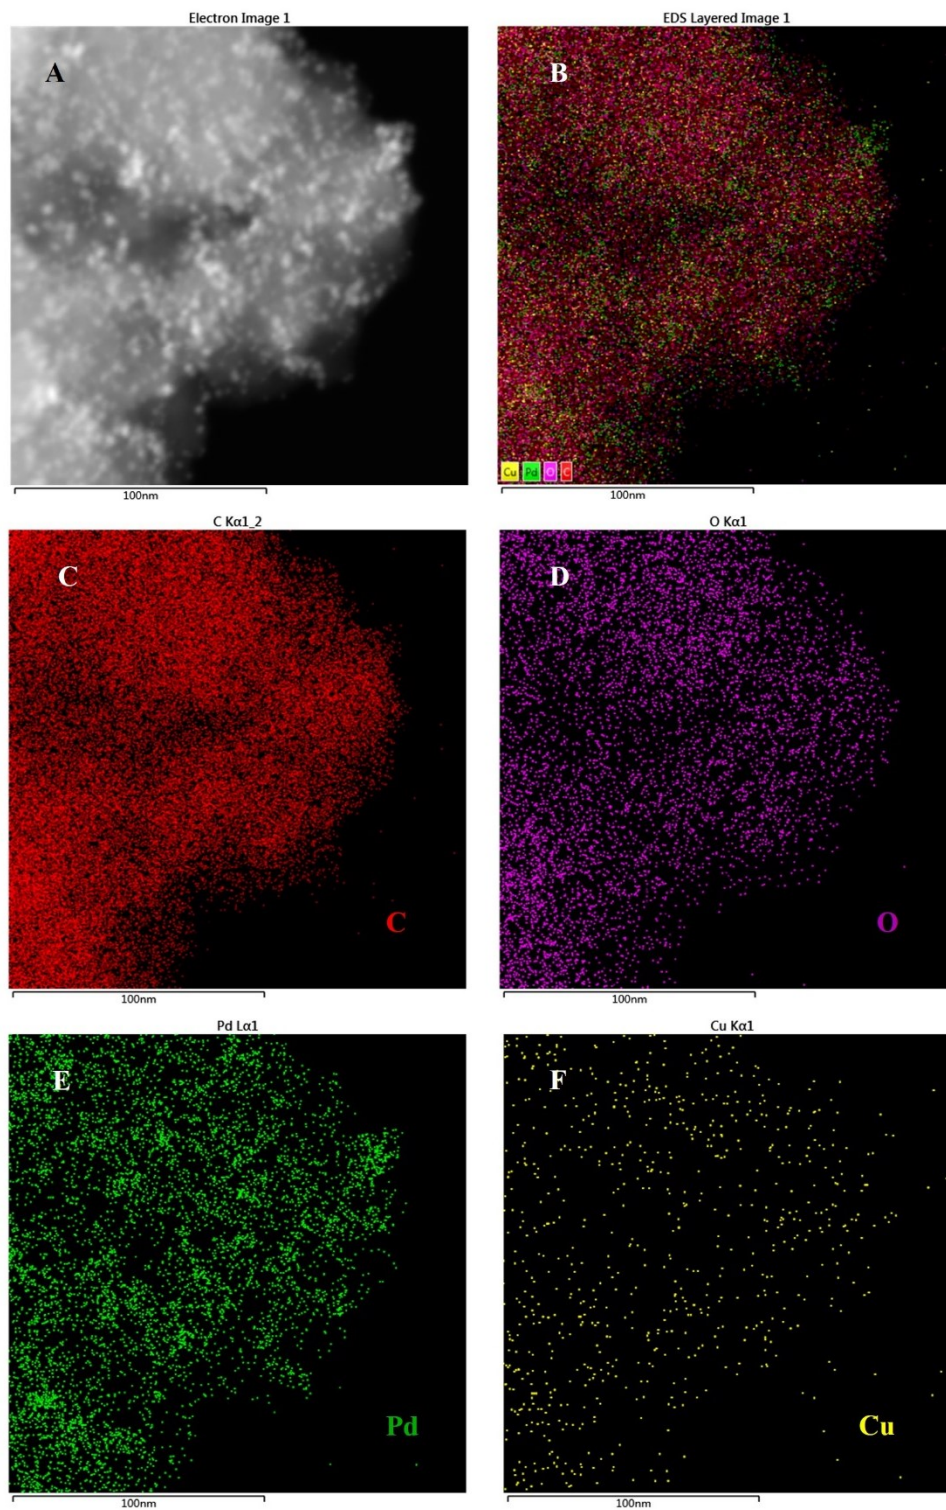

**Figure S6. (A) HAADF-STEM image, (B) EDS layered image and (C, D, E, F) the elemental mapping of C (red), O (purple), Pd (green) and Cu (yellow) of  $\gamma$ -graphyne**

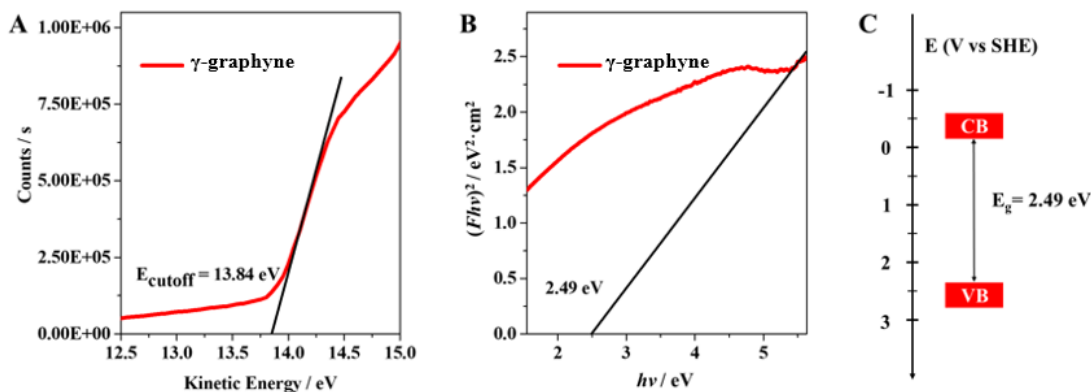

Figure S7. Bandgaps and band-edge positions. (A) Ultraviolet photoelectron spectra of  $\gamma$ -graphyne; (B)  $(Fh\nu)^2$  as a function of photon energy ( $h\nu$ ), where  $F$  is the Kubelka–Munk function of the diffuse reflectance  $R$  from Ultraviolet–visible diffuse reflectance spectra (UV–Vis DRS). The intercepts of extrapolated straight lines give the corresponding direct bandgap of  $\gamma$ -graphyne powders; (C) Band diagrams of graphyne according to the bandgap and flat-band potential obtained from (A) and (B). CB denotes conduction band. VB denotes valence band.

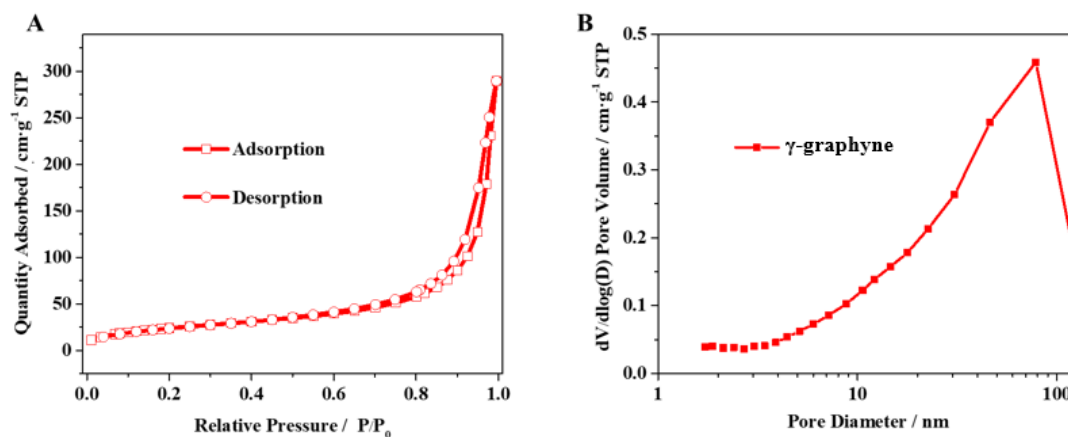

Figure S8. Gas sorption measurements for  $\gamma$ -graphyne. (A)  $\text{N}_2$  adsorption and desorption isotherms at 77 K; (B) Pore size distribution

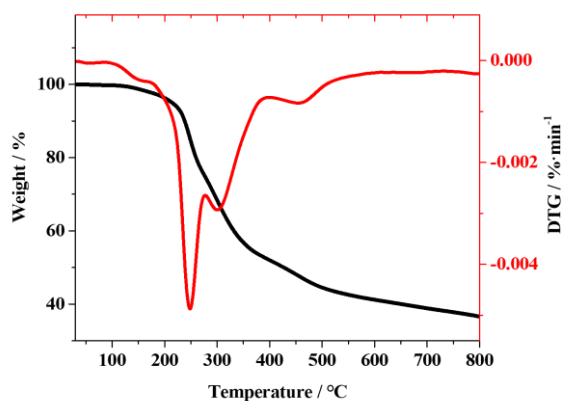

Figure S9. TG-DTG of  $\gamma$ -graphyne

### Section S4 Characterization of Reduction of Nitroarenes intermediate and product

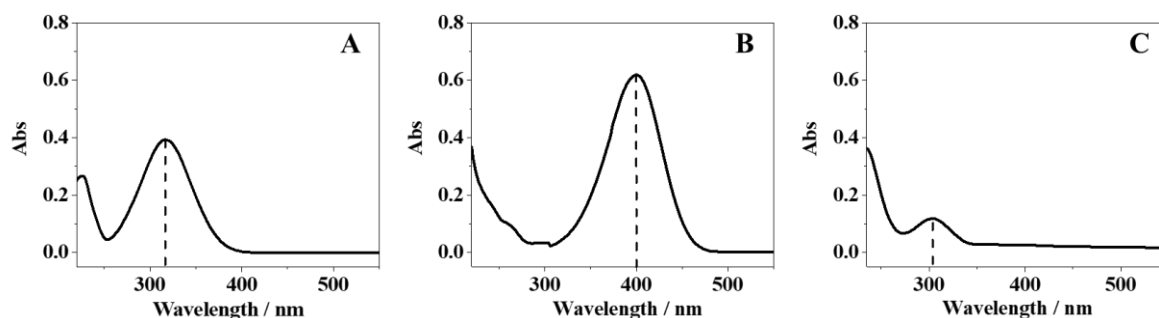

Figure S10. UV-vis spectra of 4-NP(A) before and (B) after adding NaBH<sub>4</sub> solution; (C) the solution of 4-NP with the addition of NaBH<sub>4</sub> and Pd/ $\gamma$ -graphyne.

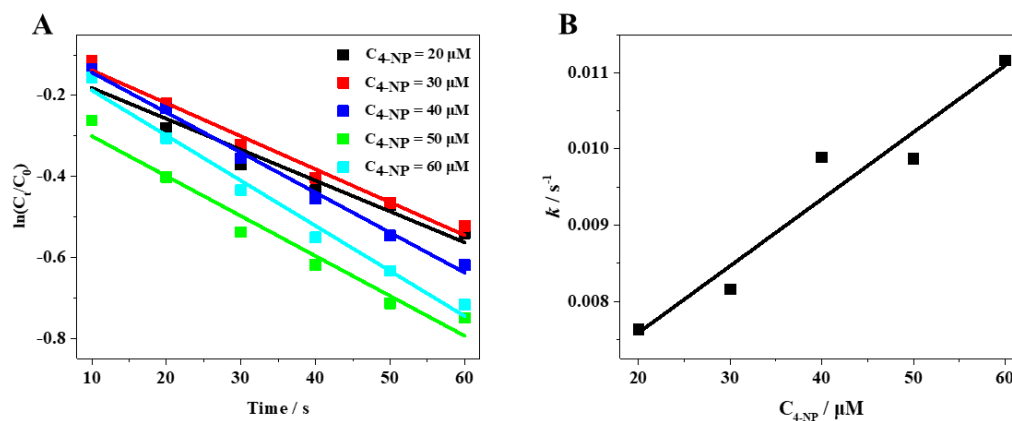

Figure S11. The reduction of 4-nitrophenol (4-NP) by NaBH<sub>4</sub> catalyzed by Pd/ $\gamma$ -graphyne. (A)  $\ln[C_t/C_0]$  as a function of absorbance (400 nm) vs time (sec), (B) The observed rate constants for the reduction of 4-NP as a function of the concentration with excess NaBH<sub>4</sub> used.

## REFERENCES

- (S1) J. Moon, M. Jang and S. Lee. Palladium-Catalyzed Decarboxylative Coupling of Alkynyl Carboxylic Acids and Aryl Halides. *The Journal of Organic Chemistry* 2009, 74(3), 1403-1406
- (S2) K. Park, G. Bae, J. Moon, et al. Synthesis of Symmetrical and Unsymmetrical Diarylalkynes from Propiolic Acid Using Palladium-Catalyzed Decarboxylative Coupling. *The Journal of Organic Chemistry* 2010, 75(18), 6244-6251
- (S3) Qi, H., et al. Graphdiyne Oxides as Excellent Substrate for Electroless Deposition of Pd Clusters with High Catalytic Activity. *Journal of the American Chemical Society* 2015, 137(16), 5260-5263
